# Supplementary material
Source: PubMed Central journal article supplement (PMC7791402)
Supplement: jamaoncol-e206789-s001.pdf [file jamaoncol-e206789-s001.pdf]

## Supplementary Online Content

Yennurajalingam S, Arthur J, Reddy S, et al. Frequency of and factors associated with nonmedical opioid use behavior among patients with cancer receiving opioids for cancer pain. *JAMA Oncol*. Published online January 7, 2021. doi:10.1001/jamaoncol.2020.6789

**eBox.** Nonmedical Opioid Use Behaviors

**eFigure.** Recursive Partitioning Classification and Regression Tree of Patients With the Presence of NMOU Behavior

**eTable.** Demographic and Clinical Characteristics by NMOU Behavior Status

This supplementary material has been provided by the authors to give readers additional information about their work.

**eBox. Nonmedical Opioid Use Behaviors**

|           | <b>Non-Medical Opioid Use behaviors</b>                                                                                       |
|-----------|-------------------------------------------------------------------------------------------------------------------------------|
| <b>1</b>  | <b>Frequent unscheduled clinic visits or phone calls for inappropriate refills</b>                                            |
| <b>2</b>  | <b>Self-escalation of opioid dose for excessive increase in the opioid dosage not consistent with patient's pain syndrome</b> |
| <b>3</b>  | <b>Reports of lost or stolen opioid prescription/medication</b>                                                               |
| <b>4</b>  | <b>Frequent emergency room visits for opioids</b>                                                                             |
| <b>5</b>  | <b>Seeking opioids from multiple physicians ("doctor shopping")</b>                                                           |
| <b>6</b>  | <b>Request for specific opioid</b>                                                                                            |
| <b>7</b>  | <b>Resistance to changes in the opioid regimen even when clinically indicated</b>                                             |
| <b>8</b>  | <b>Use of non-prescribed restricted medications or illicit drugs</b>                                                          |
| <b>9</b>  | <b>Requesting opioids for their euphoric effects or for symptoms such as anxiety or insomnia</b>                              |
| <b>10</b> | <b>Reports of impaired functioning in daily activities due to opioid use</b>                                                  |
| <b>11</b> | <b>Family member expressing concern over the patient's opioid use</b>                                                         |
| <b>12</b> | <b>Reports of hoarding drugs</b>                                                                                              |
| <b>13</b> | <b>Reports of stealing or selling prescription drugs</b>                                                                      |
| <b>14</b> | <b>Obtaining opioids from nonmedical sources, stealing, selling</b>                                                           |

**eFigure.** Recursive Partitioning Classification and Regression Tree of Patients With the Presence of NMOU Behavior

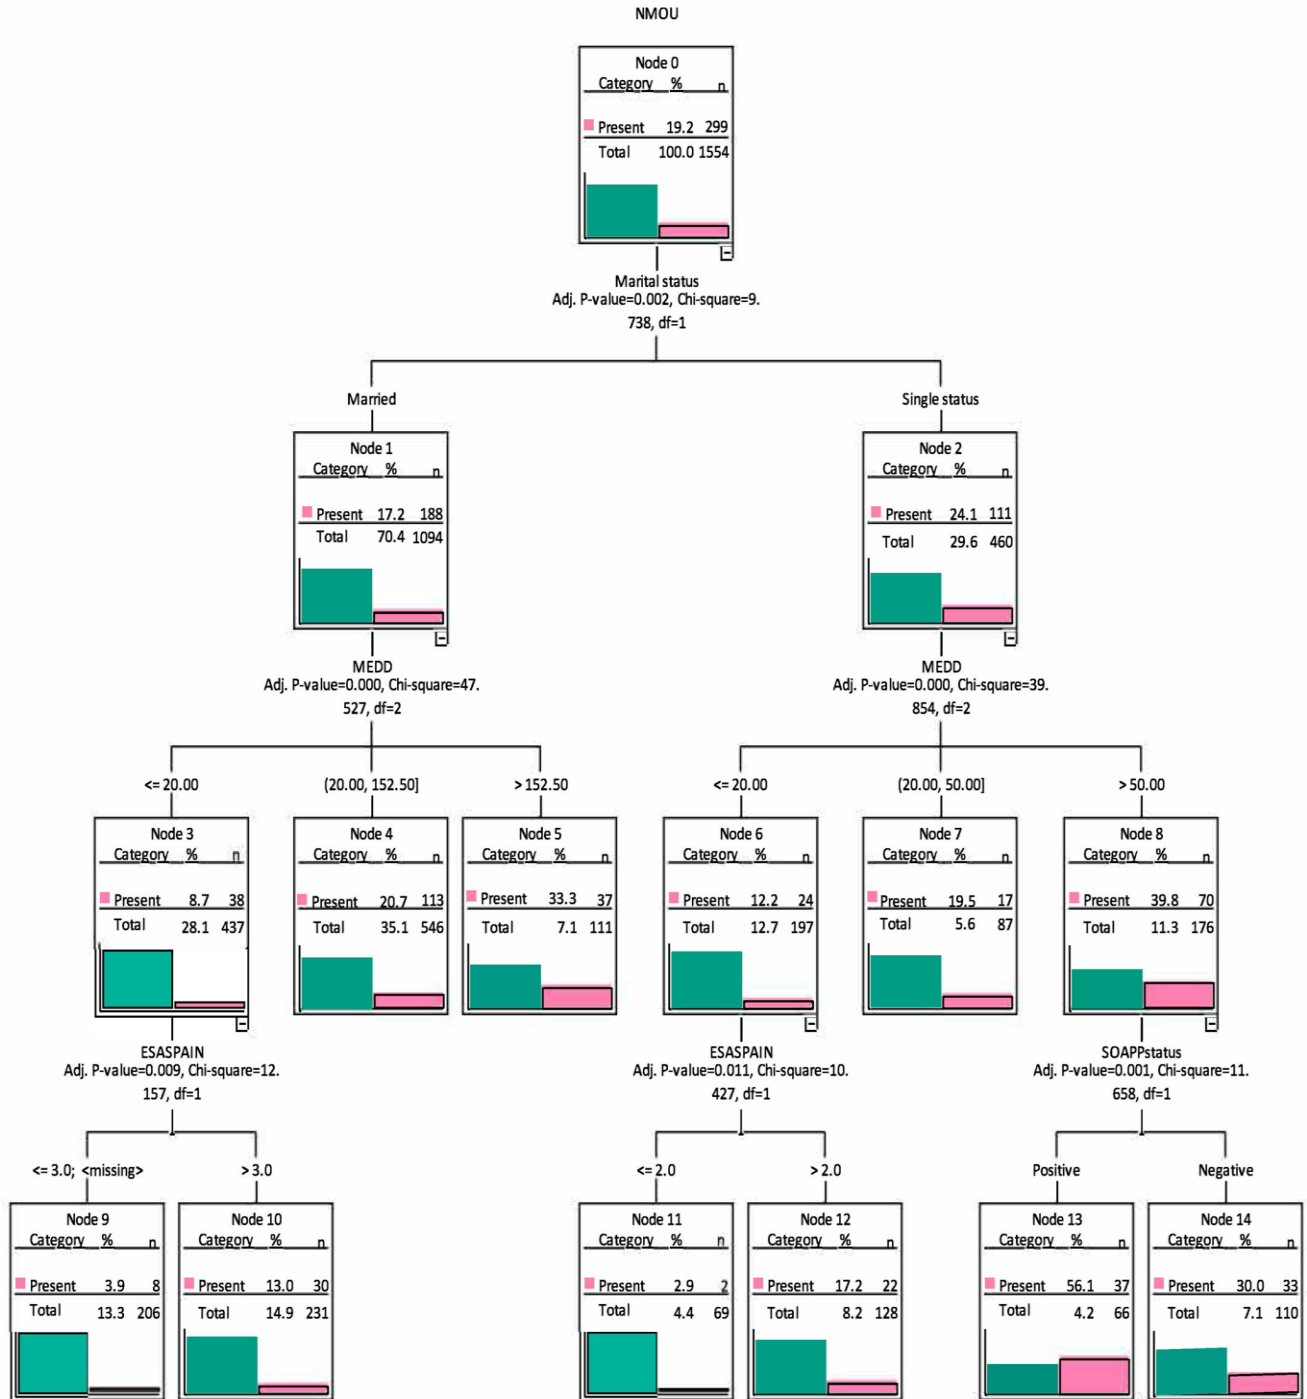

All patient demographic and clinical characteristics (Table 1) were evaluated. Nodes were pruned to 3 subgroups using a multivariate model [married status, daily opioid dose (MEDD), and cancer pain severity (ESAS Pain)] with the main outcome being the presence of NMOU behavior. In the figure, Pink Bar = % of patients with presence of NMOU Behavior; Green Bar = % of patients with absence of NMOU Behavior

Abbreviations: NMOU: Non-medical opioid use; ESAS, Edmonton Symptom Assessment System. MEDDs, Morphine Equivalent Daily Doses (mg/day); SOAP, Screener and Opioid Assessment for Patients with Pain tool.

| <b>eTable. Demographic and Clinical Characteristics by NMOU Behavior Status</b> |                             |                             |                              |                             |
|---------------------------------------------------------------------------------|-----------------------------|-----------------------------|------------------------------|-----------------------------|
| <b>Covariates</b>                                                               | <b>No. of Patients (%)</b>  |                             |                              |                             |
|                                                                                 | <b>NMOU Behavior Status</b> |                             |                              |                             |
|                                                                                 | <b>Total</b>                | <b>NMOU Behavior Absent</b> | <b>NMOU Behavior Present</b> | <b>P<sup>a</sup></b>        |
| <b>All patients, N (%)</b>                                                      | <b>1554(100%)</b>           | <b>1255(80.6%)</b>          | <b>299(19.4%)</b>            | <b>&lt;.001<sup>b</sup></b> |
| <b>Age in years, median (IQR)</b>                                               | <b>61(52, 69)</b>           | <b>61(53, 69)</b>           | <b>60(49, 68)</b>            | <b>.009<sup>b</sup></b>     |
| <b>Outpatient SCC follow-up visits; Median (IQR)</b>                            | <b>2(1, 3)</b>              | <b>2(1, 3)</b>              | <b>3(2, 4)</b>               | <b>&lt;.001<sup>b</sup></b> |
| <b>Sex: Female, N (%)</b>                                                       | <b>816(52.5%)</b>           | <b>663(81.3%)</b>           | <b>153(18.8%)</b>            | <b>.61</b>                  |
| <b>Race, N (%)</b>                                                              |                             |                             |                              |                             |
| <b>Asian</b>                                                                    | <b>99(6.4%)</b>             | <b>79(79.8%)</b>            | <b>20(20.2%)</b>             | <b>.21</b>                  |
| <b>Black or African American</b>                                                | <b>171(11%)</b>             | <b>138(80.7%)</b>           | <b>33(19.3%)</b>             |                             |
| <b>Hispanic or Latino</b>                                                       | <b>114(7.3%)</b>            | <b>91(79.8%)</b>            | <b>23(20.2%)</b>             |                             |
| <b>Other/Declined to Answer/Unknown</b>                                         | <b>46(3%)</b>               | <b>31(67.4%)</b>            | <b>15(32.6%)</b>             |                             |
| <b>White or Caucasian</b>                                                       | <b>1124(72.3%)</b>          | <b>916(81.5%)</b>           | <b>208(18.5%)</b>            |                             |
| <b>Marital Status, N (%)</b>                                                    |                             |                             |                              |                             |
| <b>Married</b>                                                                  | <b>1094(70.9%)</b>          | <b>906(82.8%)</b>           | <b>188(17.2%)</b>            | <b>.009<sup>b</sup></b>     |
| <b>Single</b>                                                                   | <b>183(11.9%)</b>           | <b>135(73.8%)</b>           | <b>48(26.2%)</b>             |                             |
| <b>Smoking Status, N (%)</b>                                                    |                             |                             |                              |                             |
| <b>Current Smoker</b>                                                           | <b>120(7.7%)</b>            | <b>82(68.3%)</b>            | <b>38(31.7%)</b>             | <b>&lt;.001<sup>b</sup></b> |
| <b>Former Smoker</b>                                                            | <b>633(40.9%)</b>           | <b>504(79.6%)</b>           | <b>129(20.4%)</b>            |                             |
| <b>Never Smoker</b>                                                             | <b>796(51.4%)</b>           | <b>665(83.5%)</b>           | <b>131(16.5%)</b>            |                             |
| <b>Cancer Diagnosis, N (%)</b>                                                  |                             |                             |                              |                             |
| <b>Breast</b>                                                                   | <b>222(14.3%)</b>           | <b>176(79.3%)</b>           | <b>46(20.7%)</b>             | <b>.67</b>                  |
| <b>Gastrointestinal</b>                                                         | <b>257(16.6%)</b>           | <b>214(83.3%)</b>           | <b>43(16.7%)</b>             |                             |
| <b>Genitourinary</b>                                                            | <b>183(11.8%)</b>           | <b>146(79.8%)</b>           | <b>37(20.2%)</b>             |                             |
| <b>Gynecologic</b>                                                              | <b>122(7.9%)</b>            | <b>99(81.1%)</b>            | <b>23(18.9%)</b>             |                             |
| <b>Head &amp; Neck</b>                                                          | <b>263(17%)</b>             | <b>213(81%)</b>             | <b>50(19%)</b>               |                             |
| <b>Leukemia/Lymphoma</b>                                                        | <b>66(4.3%)</b>             | <b>56(84.8%)</b>            | <b>10(15.2%)</b>             |                             |
| <b>Melanoma</b>                                                                 | <b>71(4.6%)</b>             | <b>62(87.3%)</b>            | <b>9(12.7%)</b>              |                             |

|                                                                                                                                                                                                                                                                                                                                                                                                                                                                                                                                                                                                                                                                                                                                                               |              |                             |                              |                      |
|---------------------------------------------------------------------------------------------------------------------------------------------------------------------------------------------------------------------------------------------------------------------------------------------------------------------------------------------------------------------------------------------------------------------------------------------------------------------------------------------------------------------------------------------------------------------------------------------------------------------------------------------------------------------------------------------------------------------------------------------------------------|--------------|-----------------------------|------------------------------|----------------------|
| Other                                                                                                                                                                                                                                                                                                                                                                                                                                                                                                                                                                                                                                                                                                                                                         | 29(1.9%)     | 21(72.4%)                   | 8(27.6%)                     |                      |
| Sarcoma                                                                                                                                                                                                                                                                                                                                                                                                                                                                                                                                                                                                                                                                                                                                                       | 77(5%)       | 59(76.6%)                   | 18(23.4%)                    |                      |
| Thoracic                                                                                                                                                                                                                                                                                                                                                                                                                                                                                                                                                                                                                                                                                                                                                      | 260(16.8%)   | 206(79.2%)                  | 54(20.8%)                    |                      |
| <b>ECOG Performance Status, N (%)</b>                                                                                                                                                                                                                                                                                                                                                                                                                                                                                                                                                                                                                                                                                                                         |              |                             |                              |                      |
| 0-2                                                                                                                                                                                                                                                                                                                                                                                                                                                                                                                                                                                                                                                                                                                                                           | 1072(69.1%)  | 864(80.6%)                  | 208(19.4%)                   | .85                  |
| 3-4                                                                                                                                                                                                                                                                                                                                                                                                                                                                                                                                                                                                                                                                                                                                                           | 479(30.9%)   | 388(81.0%)                  | 91(19.0%)                    |                      |
| <b>CAGE, N (%)</b>                                                                                                                                                                                                                                                                                                                                                                                                                                                                                                                                                                                                                                                                                                                                            |              |                             |                              |                      |
| Positive (≥2)                                                                                                                                                                                                                                                                                                                                                                                                                                                                                                                                                                                                                                                                                                                                                 | 179(11.5%)   | 131(73.2%)                  | 48(26.8%)                    | .007 <sup>b</sup>    |
| <b>SOAPP Total, N (%)</b>                                                                                                                                                                                                                                                                                                                                                                                                                                                                                                                                                                                                                                                                                                                                     |              |                             |                              |                      |
| Positive (≥7)                                                                                                                                                                                                                                                                                                                                                                                                                                                                                                                                                                                                                                                                                                                                                 | 328(21.1%)   | 240(73.2%)                  | 88(26.8%)                    | <.001 <sup>b</sup>   |
|                                                                                                                                                                                                                                                                                                                                                                                                                                                                                                                                                                                                                                                                                                                                                               | <b>Total</b> | <b>NMOU Behavior Absent</b> | <b>NMOU Behavior Present</b> | <b>P<sup>a</sup></b> |
| MEDDs in mg/day, median (IQR)                                                                                                                                                                                                                                                                                                                                                                                                                                                                                                                                                                                                                                                                                                                                 | 30(0 , 90)   | 30(0 , 75)                  | 75(30 , 135)                 | <.001 <sup>b</sup>   |
| <b>ESAS Scores, median (IQR)</b>                                                                                                                                                                                                                                                                                                                                                                                                                                                                                                                                                                                                                                                                                                                              |              |                             |                              |                      |
| Pain                                                                                                                                                                                                                                                                                                                                                                                                                                                                                                                                                                                                                                                                                                                                                          | 6(3 , 8)     | 6(3 , 8)                    | 7(5 , 8)                     | <.001 <sup>b</sup>   |
| Fatigue                                                                                                                                                                                                                                                                                                                                                                                                                                                                                                                                                                                                                                                                                                                                                       | 6(3 , 8)     | 6(3 , 8)                    | 6(4 , 8)                     | .09                  |
| Nausea                                                                                                                                                                                                                                                                                                                                                                                                                                                                                                                                                                                                                                                                                                                                                        | 0(0 , 4)     | 0(0 , 4)                    | 0(0 , 4)                     | .79                  |
| Depression                                                                                                                                                                                                                                                                                                                                                                                                                                                                                                                                                                                                                                                                                                                                                    | 1(0 , 4)     | 1(0 , 4)                    | 1(0 , 4)                     | .76                  |
| Anxiety                                                                                                                                                                                                                                                                                                                                                                                                                                                                                                                                                                                                                                                                                                                                                       | 2(0 , 5)     | 2(0 , 5)                    | 3(0 , 6)                     | .40                  |
| Drowsiness                                                                                                                                                                                                                                                                                                                                                                                                                                                                                                                                                                                                                                                                                                                                                    | 3(0 , 5)     | 3(0 , 5)                    | 3(1 , 6)                     | .10                  |
| Dyspnea                                                                                                                                                                                                                                                                                                                                                                                                                                                                                                                                                                                                                                                                                                                                                       | 1(0 , 4)     | 1(0 , 4)                    | 1(0 , 4)                     | .74                  |
| Appetite                                                                                                                                                                                                                                                                                                                                                                                                                                                                                                                                                                                                                                                                                                                                                      | 5(2 , 7)     | 5(2 , 7)                    | 5(2 , 7)                     | .79                  |
| Well Being                                                                                                                                                                                                                                                                                                                                                                                                                                                                                                                                                                                                                                                                                                                                                    | 5(3 , 7)     | 5(3 , 7)                    | 5(3 , 7)                     | .26                  |
| Sleep                                                                                                                                                                                                                                                                                                                                                                                                                                                                                                                                                                                                                                                                                                                                                         | 5(3 , 7)     | 5(3 , 7)                    | 5(3 , 8)                     | .037 <sup>b</sup>    |
| Financial Distress                                                                                                                                                                                                                                                                                                                                                                                                                                                                                                                                                                                                                                                                                                                                            | 2(0 , 5)     | 1(0 , 5)                    | 2(0 , 5)                     | .013 <sup>b</sup>    |
| Spiritual Pain                                                                                                                                                                                                                                                                                                                                                                                                                                                                                                                                                                                                                                                                                                                                                | 0(0 , 2)     | 0(0 , 2)                    | 0(0 , 2)                     | .49                  |
| <p>Abbreviations: SCC: supportive care clinic; NMOU: Non-medical opioid use; ECOG Performance Status, Eastern Cooperative Oncology Group performance status; CAGE-AID, Cut Down-Annoyed-Guilty-Eye Opener assessment; ESAS, Edmonton Symptom Assessment System. MEDDs, Morphine Equivalent Daily Doses (mg/day); IQR, interquartile range; SOAPP, Screener and Opioid Assessment for Patients with Pain tool.</p> <p>a. P-value is testing the differences between frequencies in NMOU behaviors group present vs. absent. The chi-square test or the Fisher's exact test was used for categorical variables, and the Wilcoxon rank-sum test was used for continuous variables.</p> <p>b. These P values indicate a statistically significant difference.</p> |              |                             |                              |                      |
